# Supplementary material
Source: publisher figshare collection journal article supplement (https://acs.figshare.com/ndownloader/files/5150488)

**Free Radical Oxidation of (*E*)-Retinoic Acid by the Fenton Reagent: Competing Epoxidation and Oxidative Breakdown Pathways and Novel Products of 5,6-Epoxyretinoic Acid Transformation.**

Authors: Lucia Panzella, Paola Manini, Alessandra Napolitano, and Marco d'Ischia\*

**Figure S1.**  $^1\text{H}$  NMR spectrum of compound **7**.

2

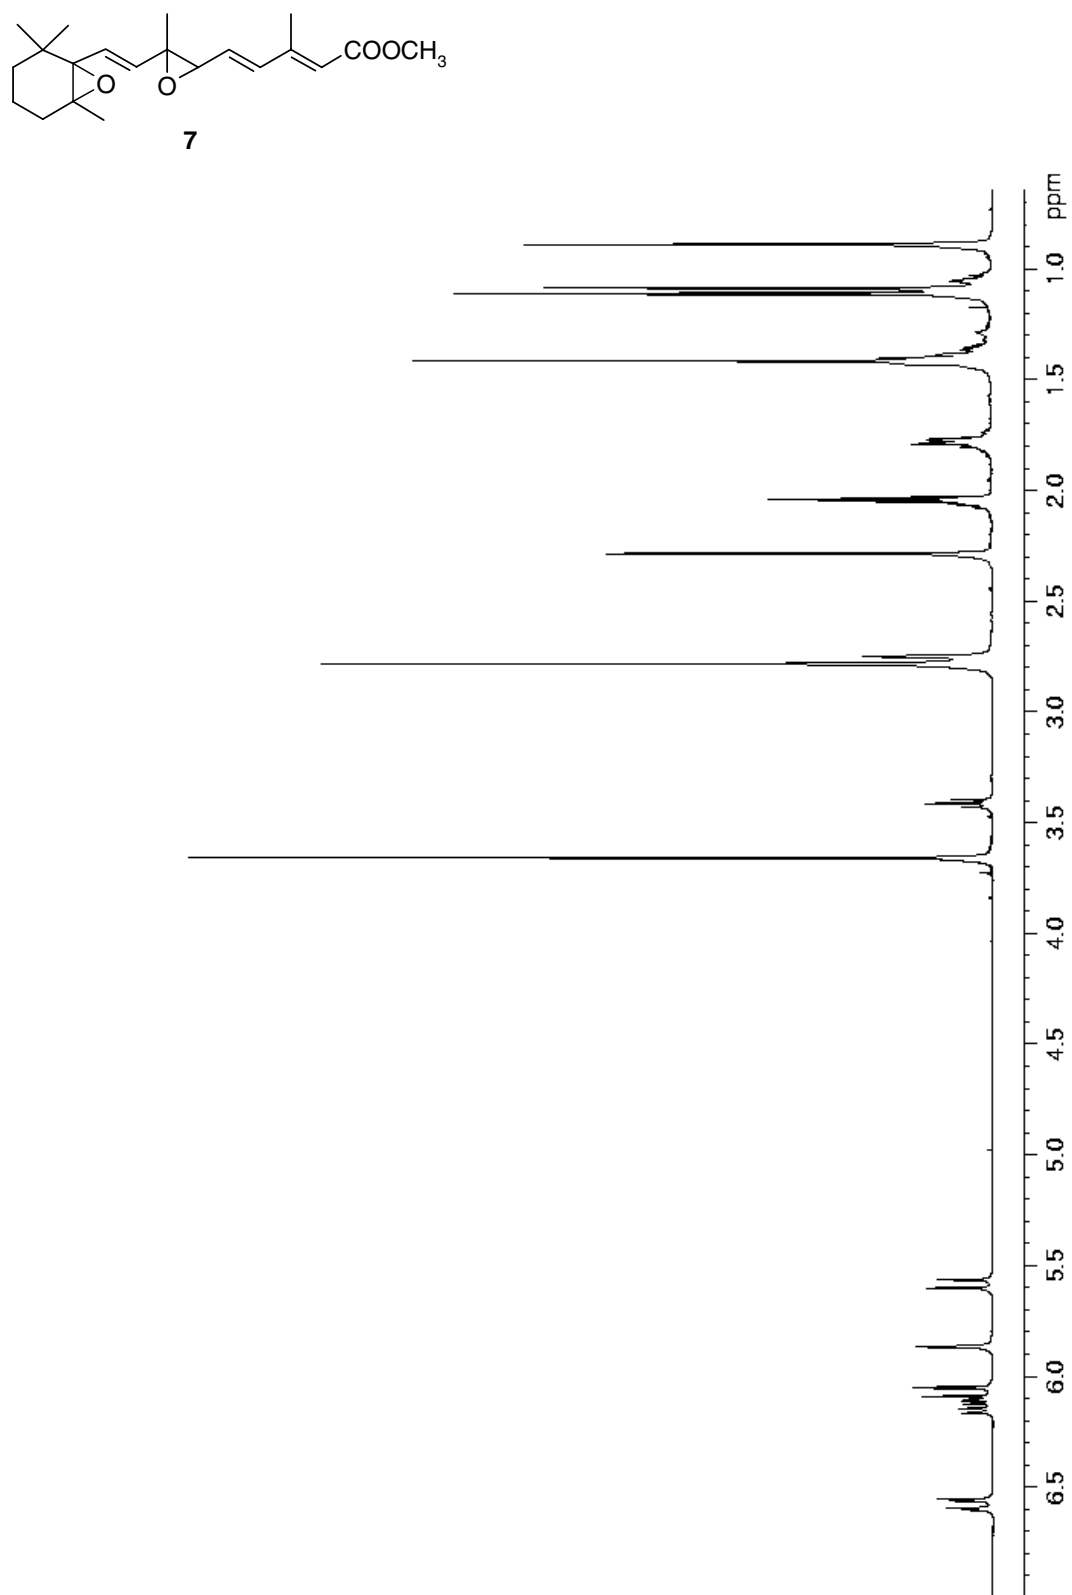

**Figure S2.**  $^1\text{H}$ ,  $^{13}\text{C}$  HMBC spectrum of compound **7**.

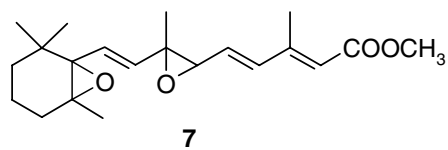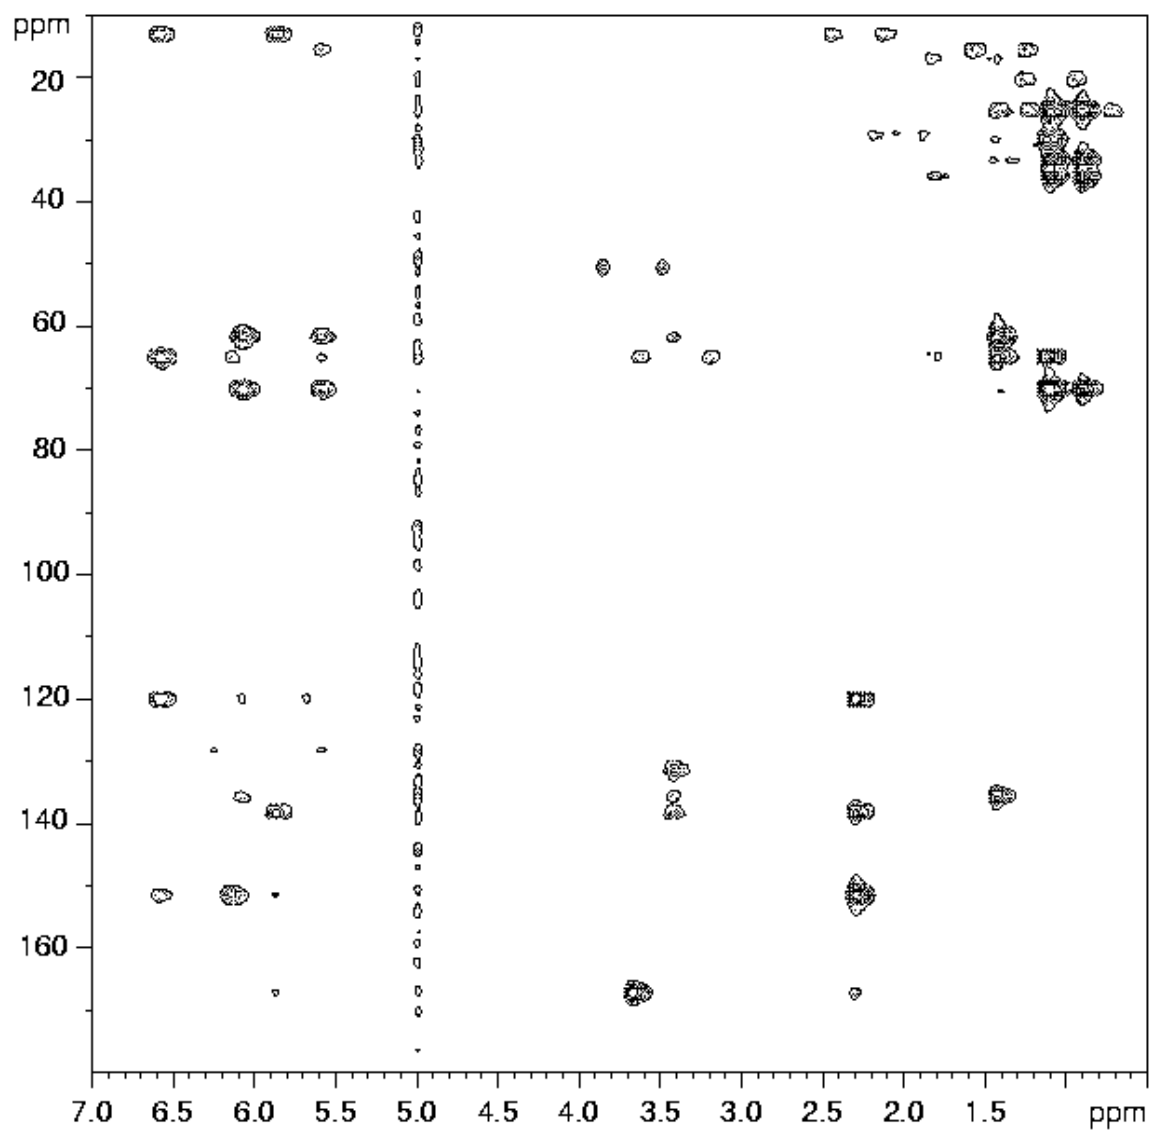

**Figure S3.** ROESY spectrum of compound **7**.

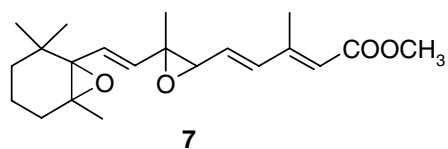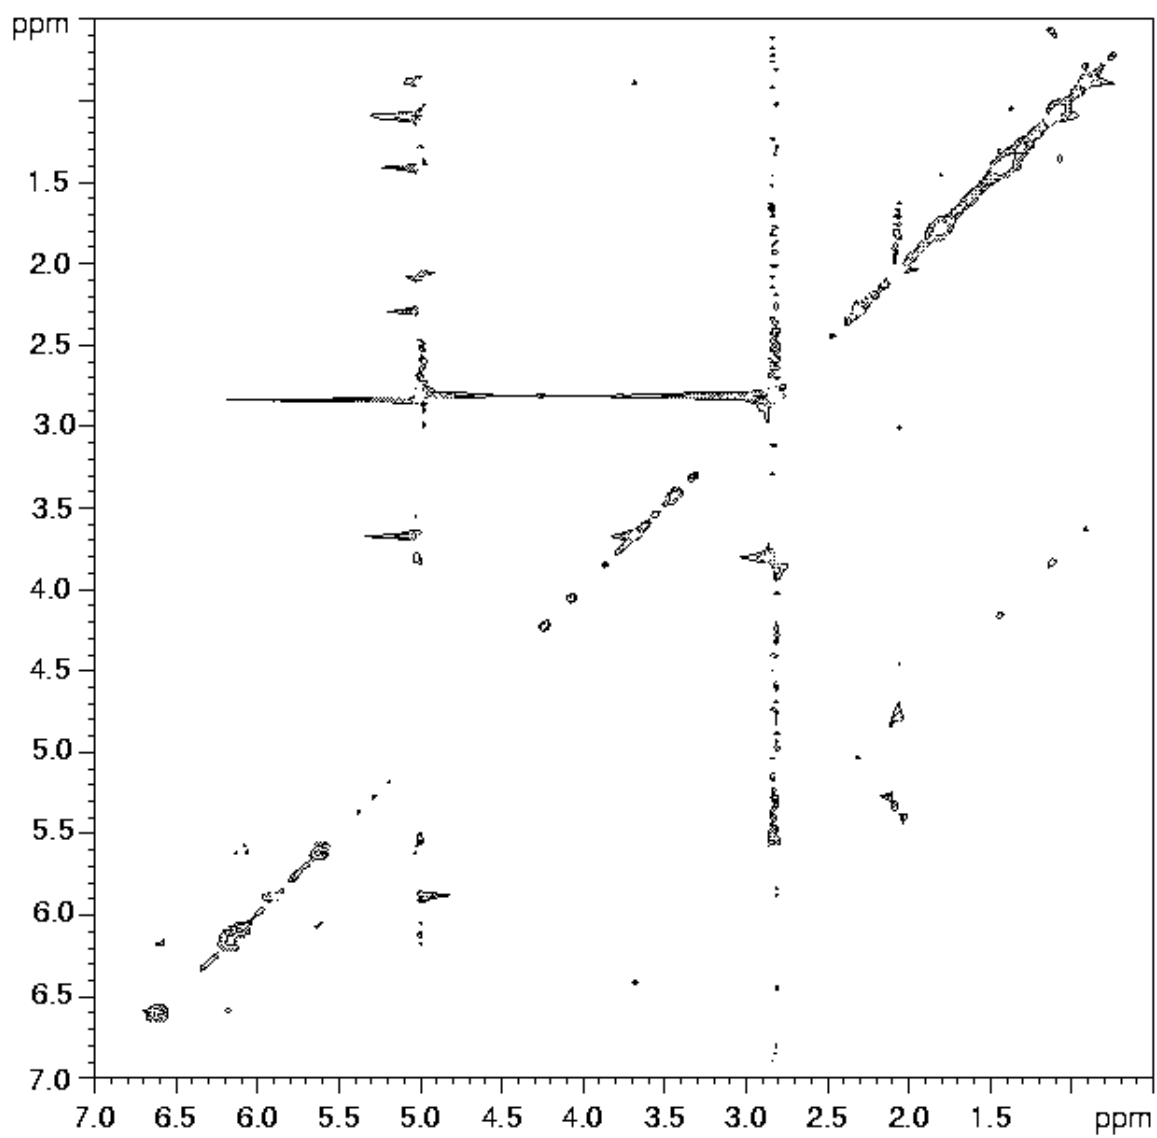

**Figure S4.**  $^1\text{H}$  NMR spectrum of compound **8**.

5

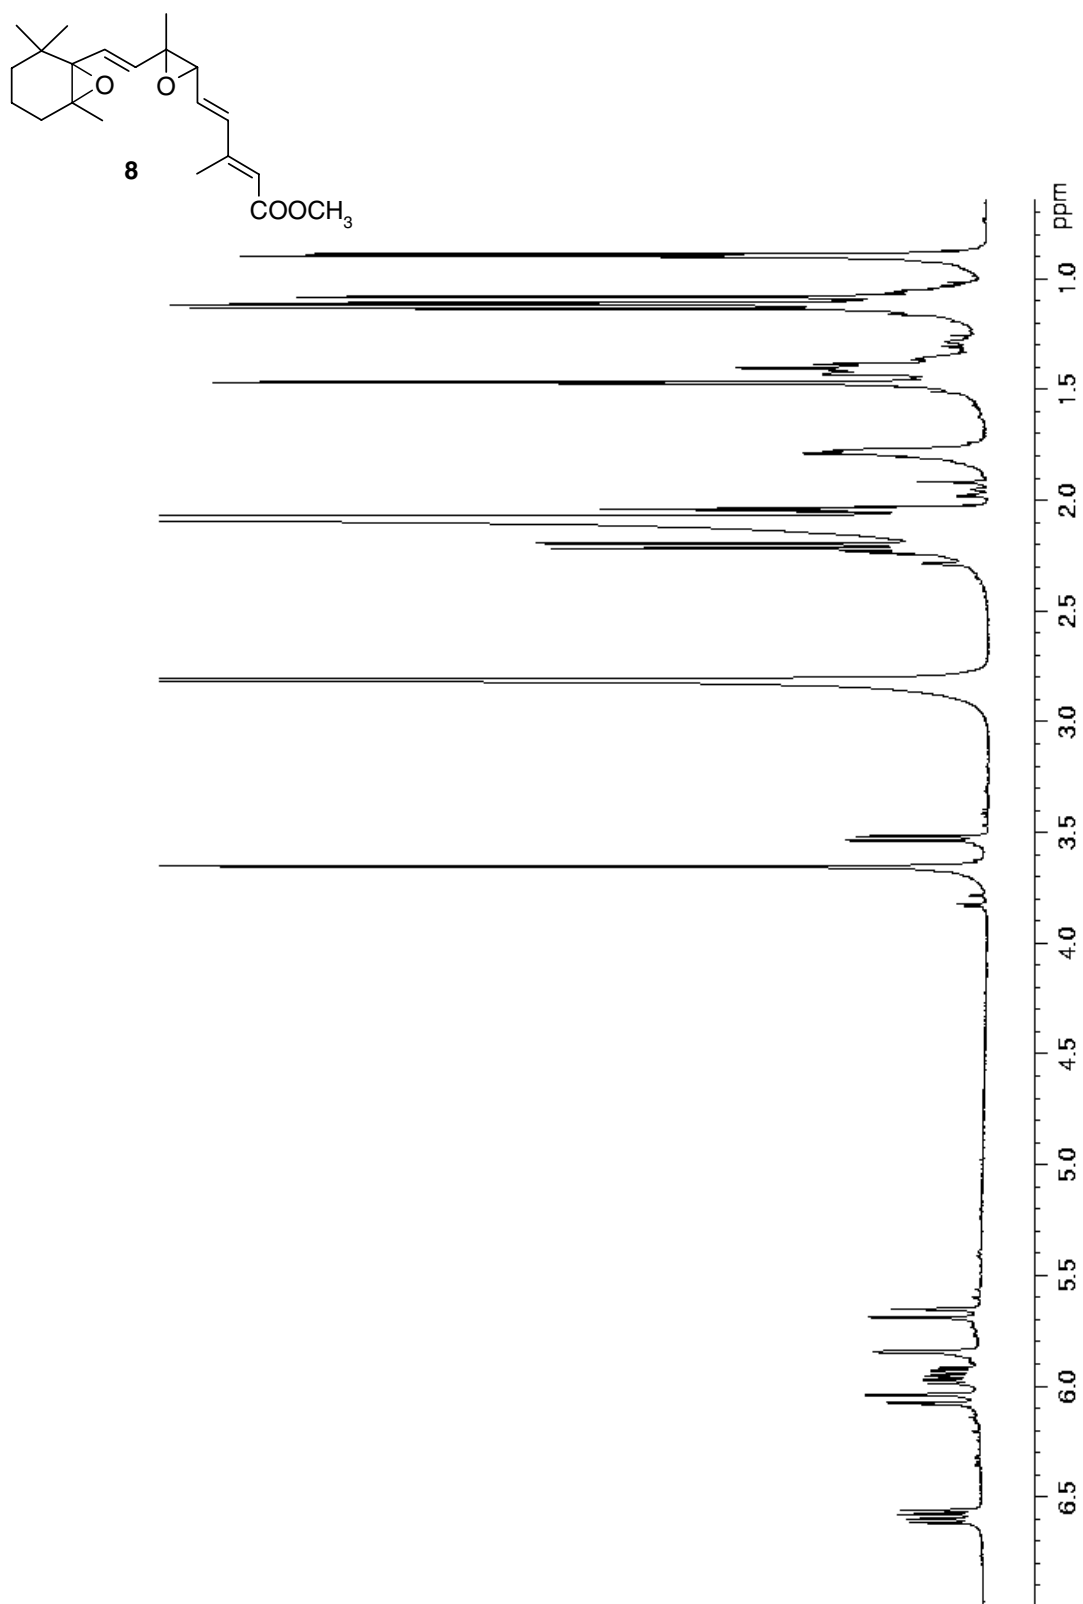

**Figure S5.**  $^1\text{H}$ ,  $^{13}\text{C}$  HMBC spectrum of compound **8**.

6

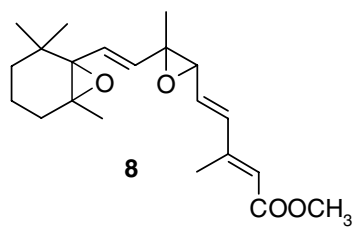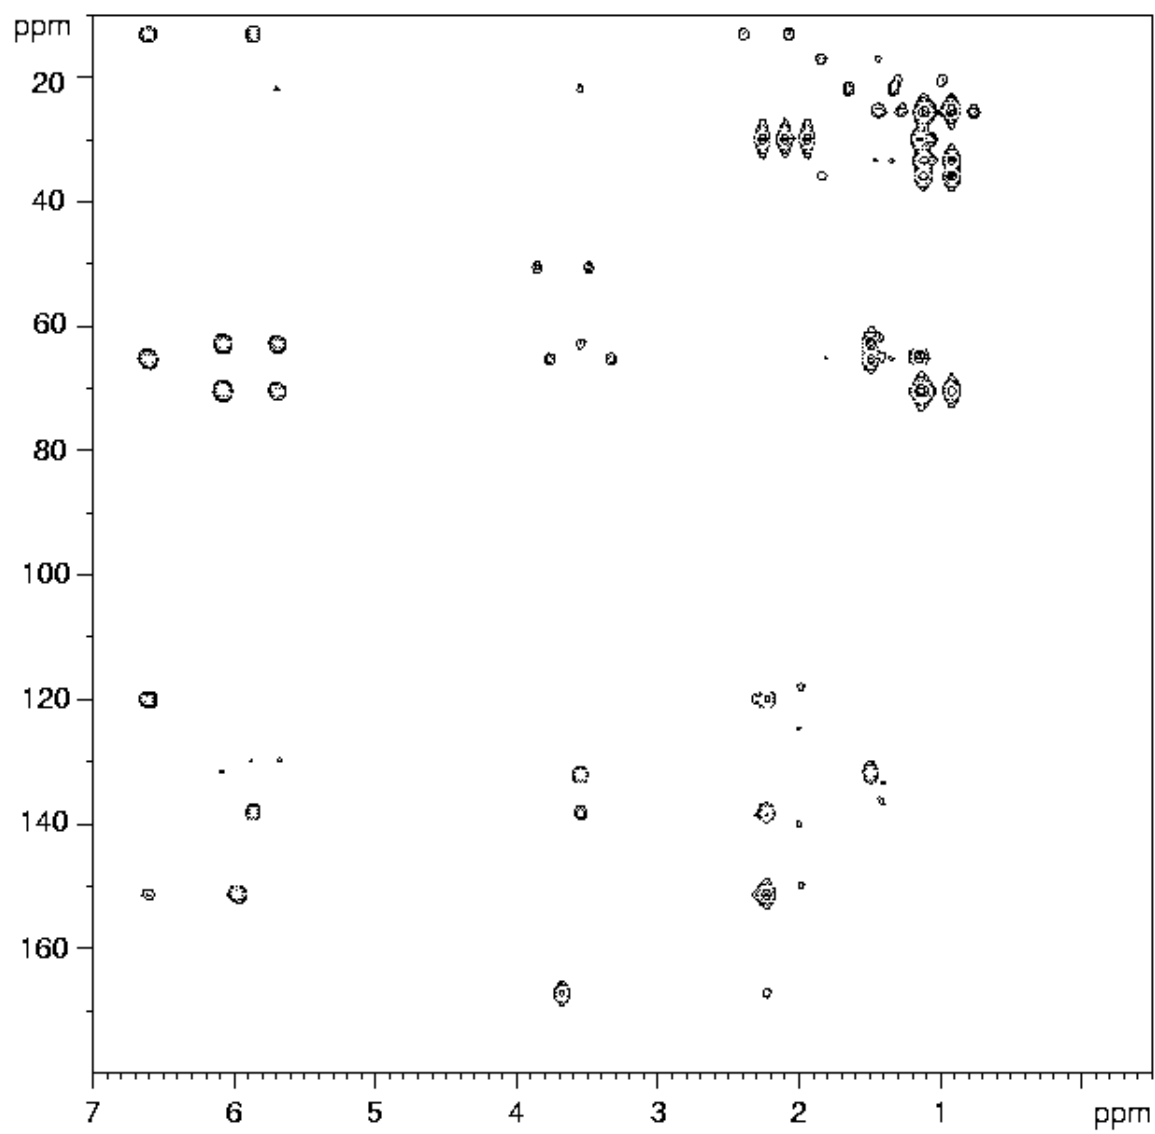

**Figure S6.** ROESY spectrum of compound **8**.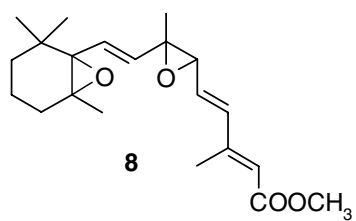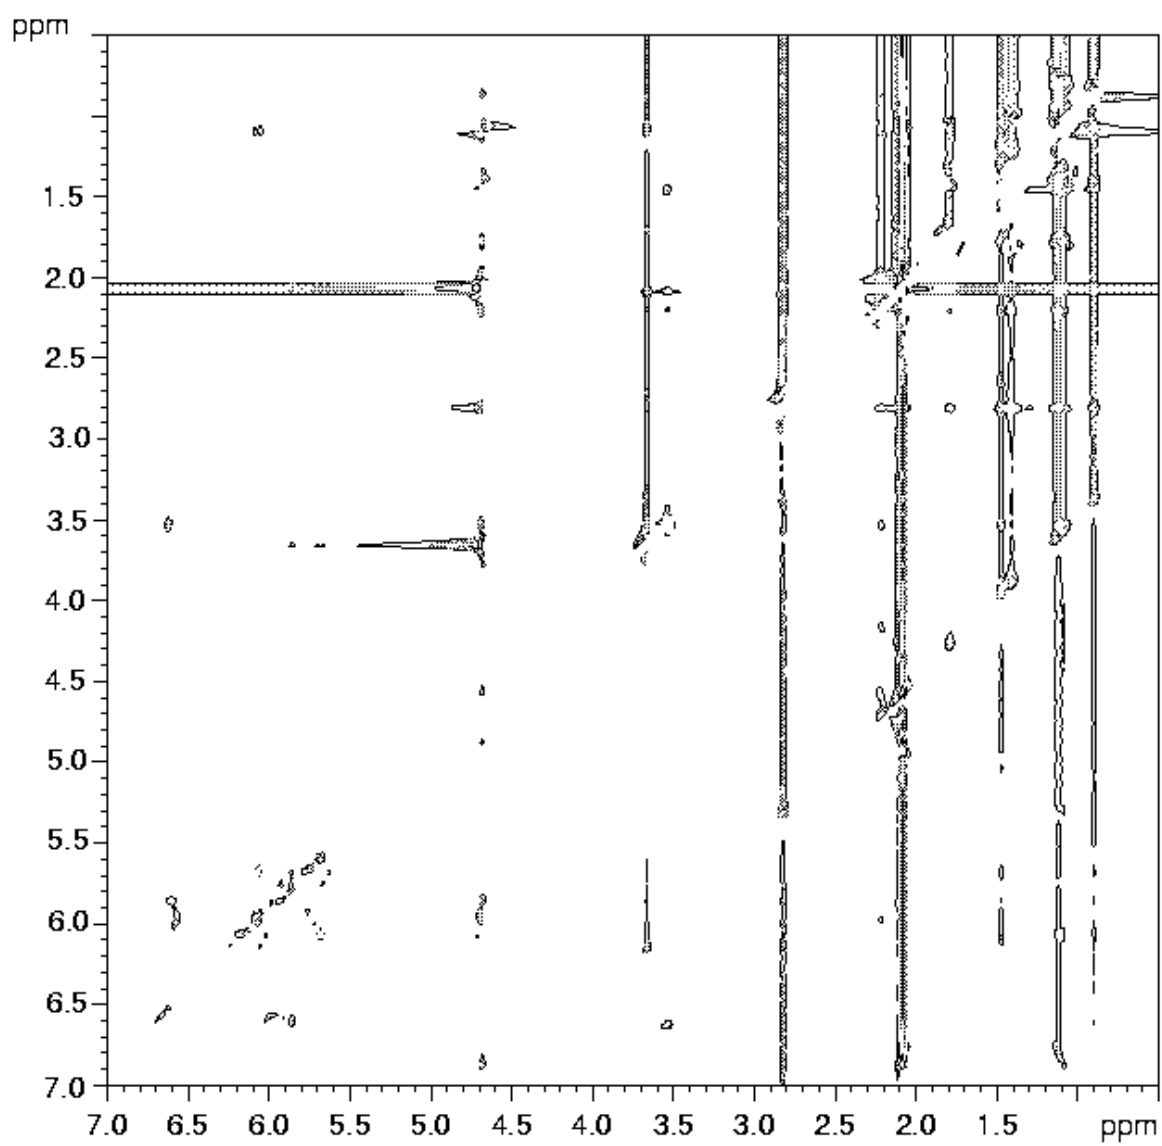

Supplement: Supplementary file 1 [file 5150488]
